# Supplementary material for: Automatic generation of objective footprint outlines
Source: PeerJ journal article supplement (doi:10.7717/peerj.7203), 2019-06-27

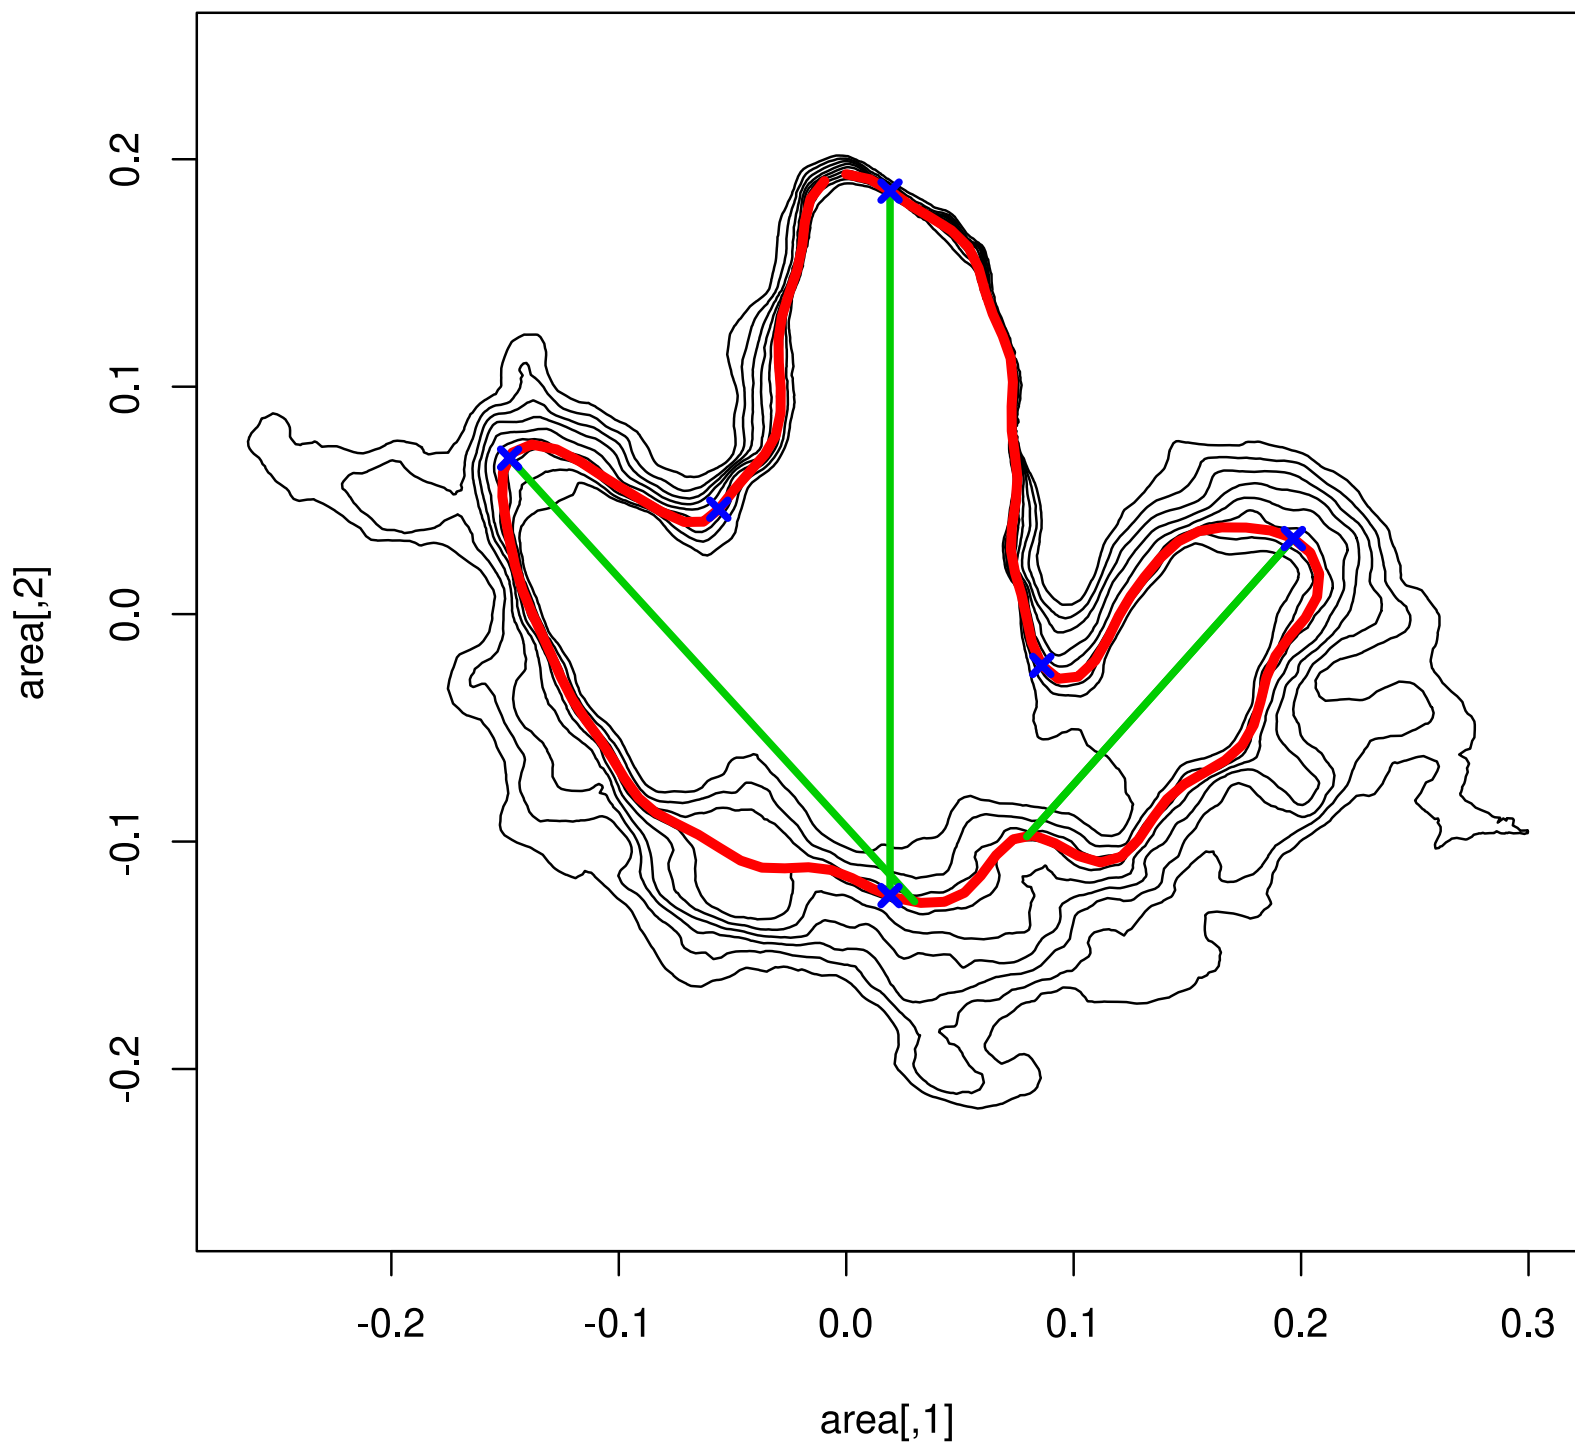

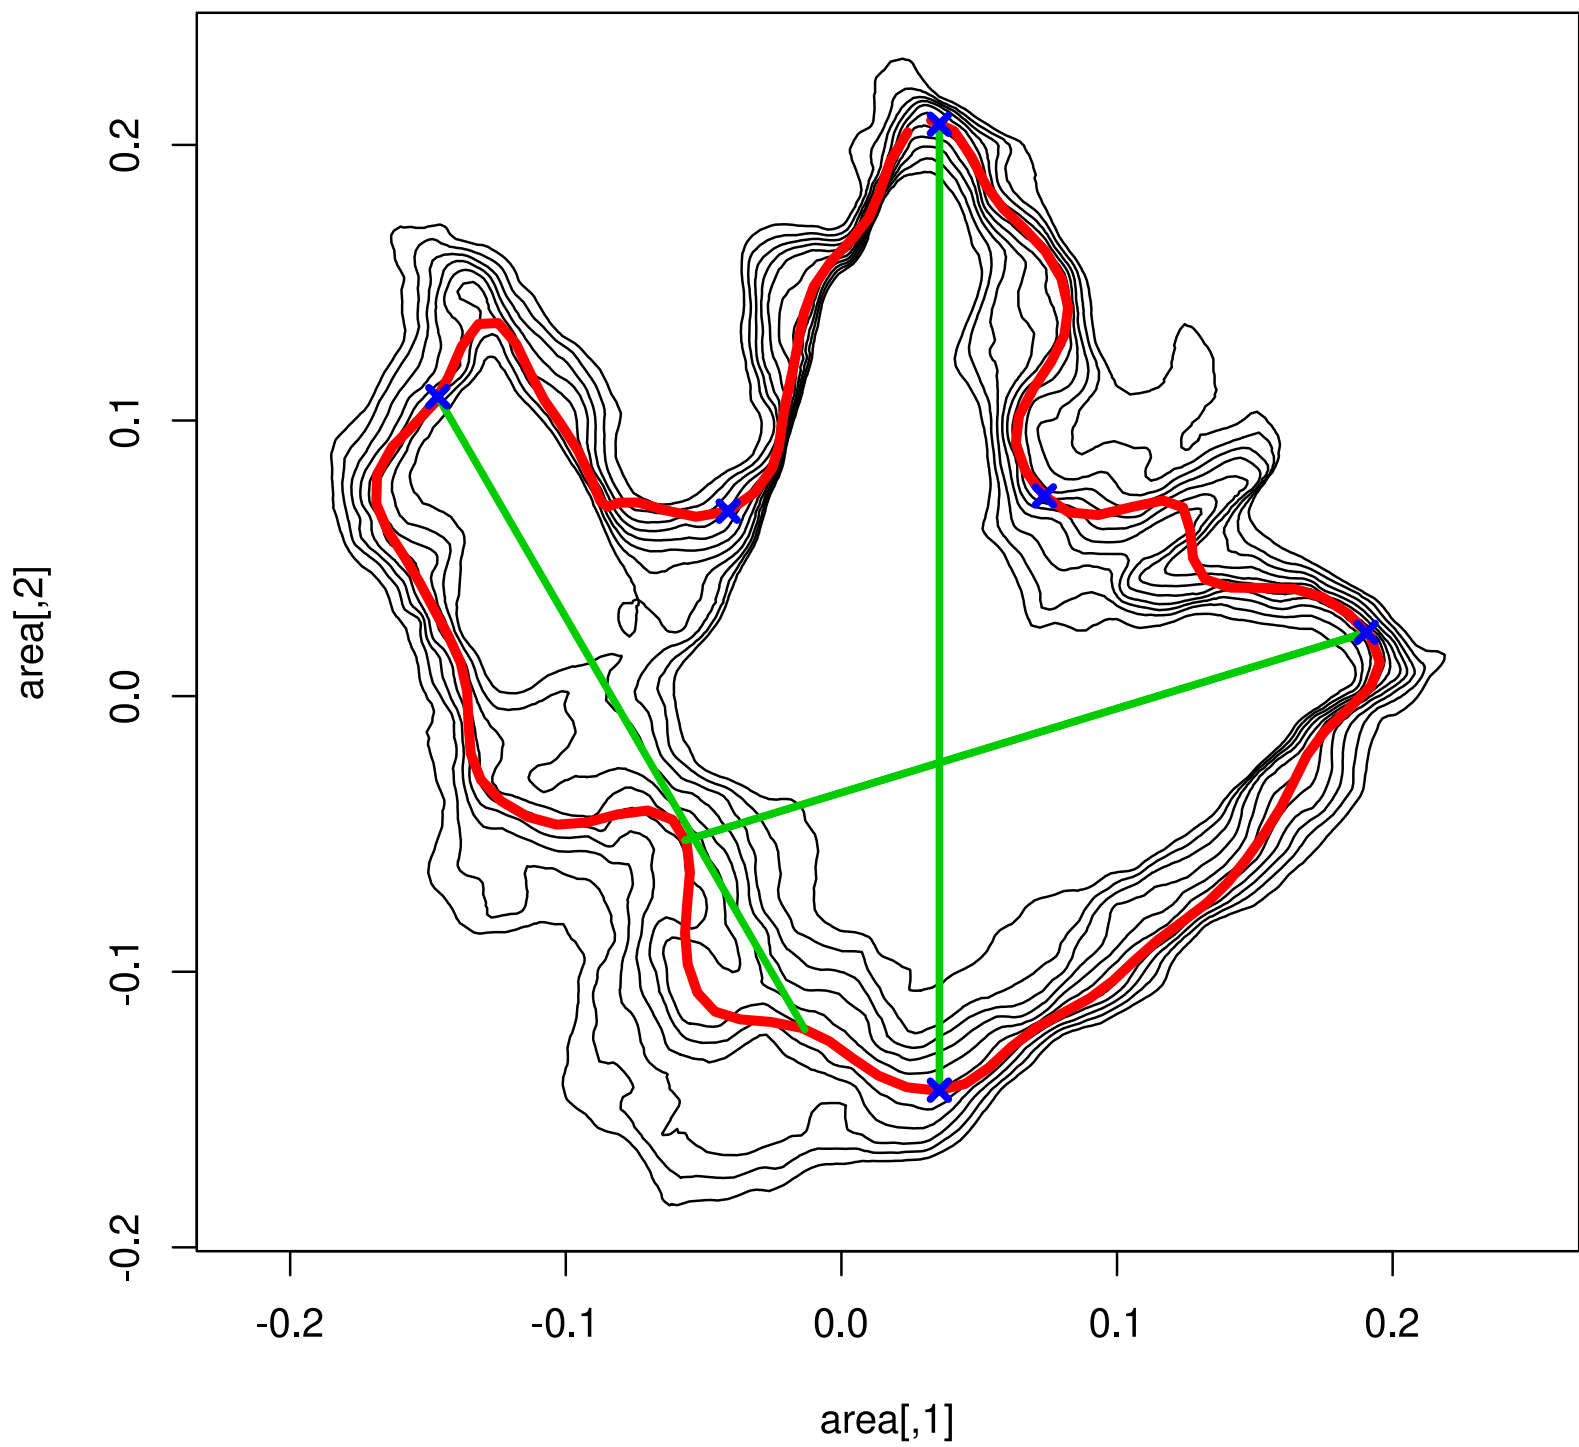

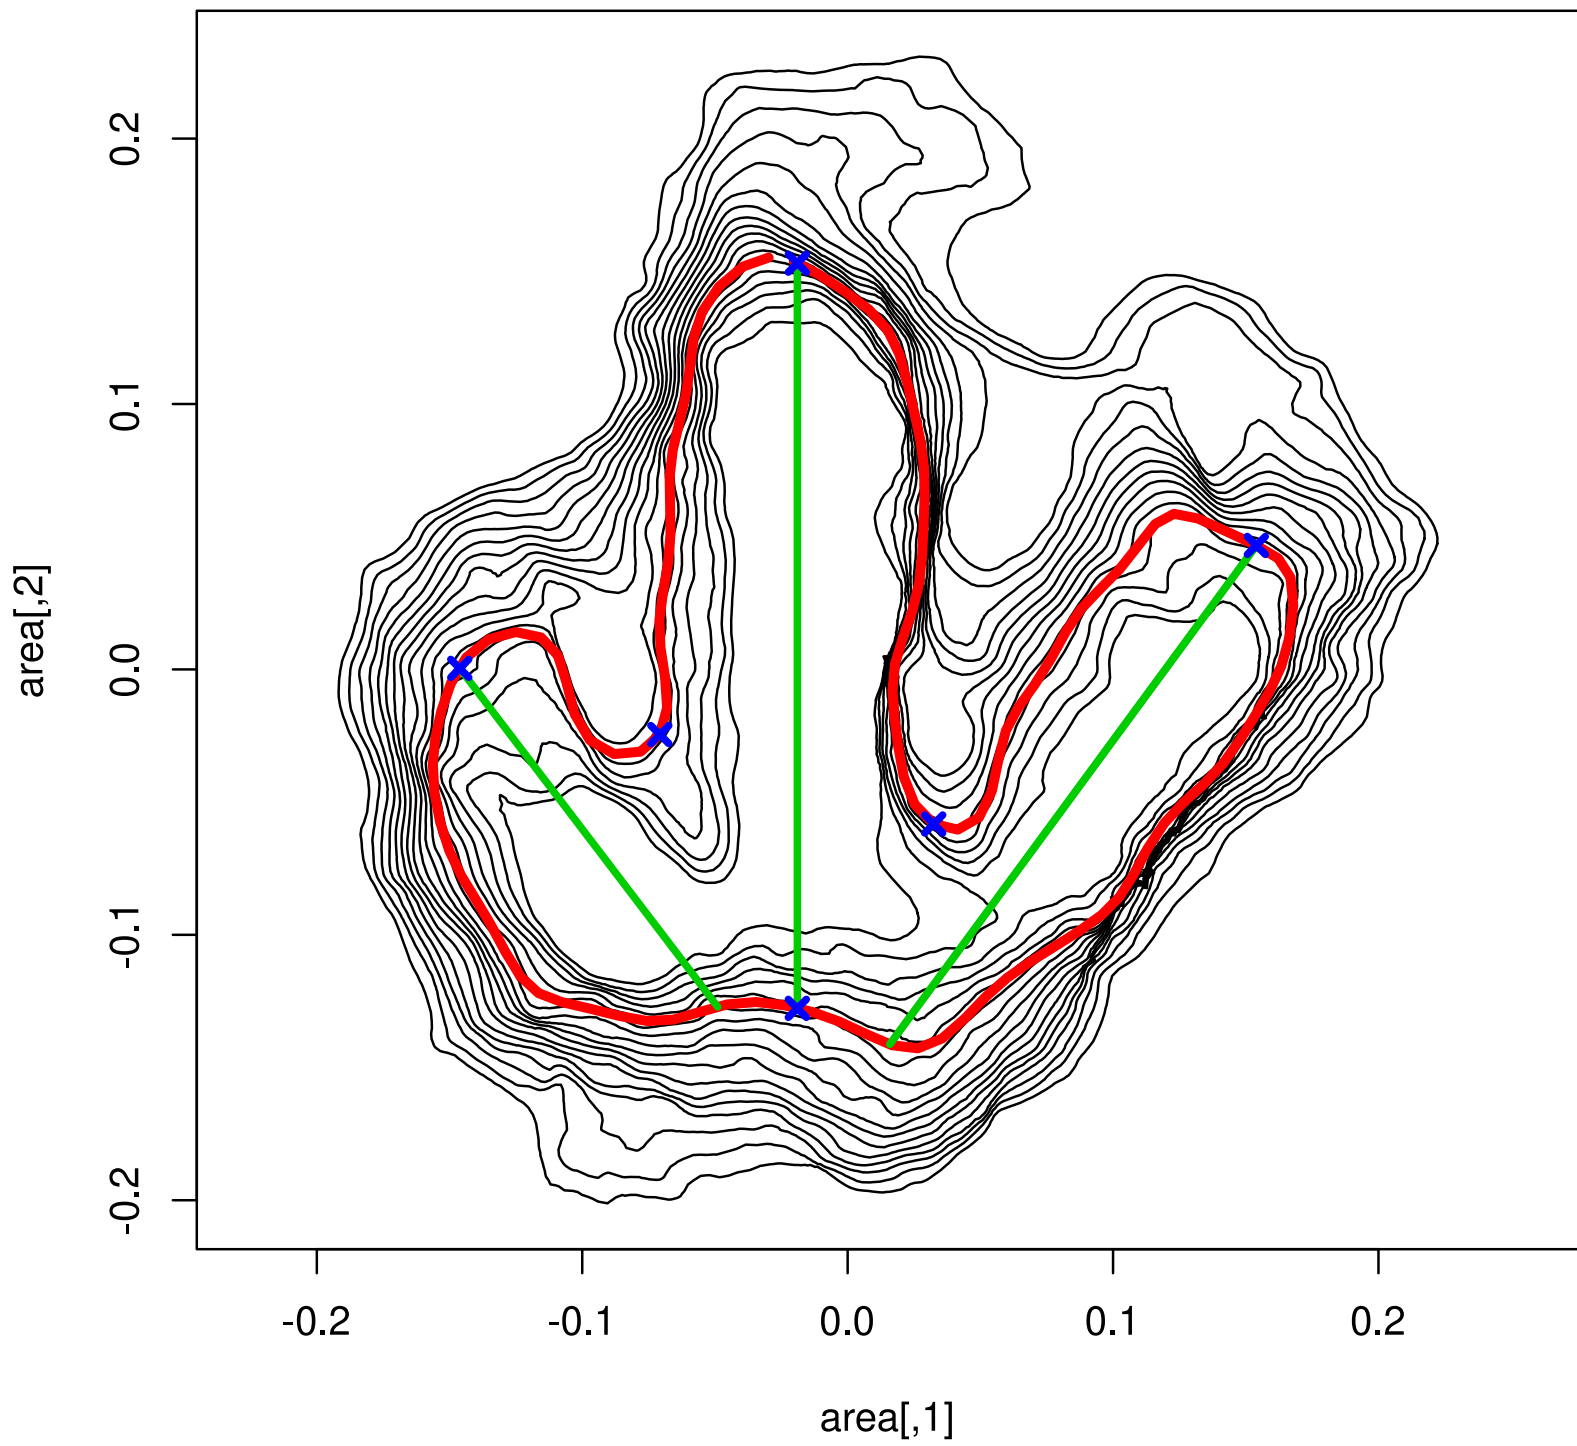

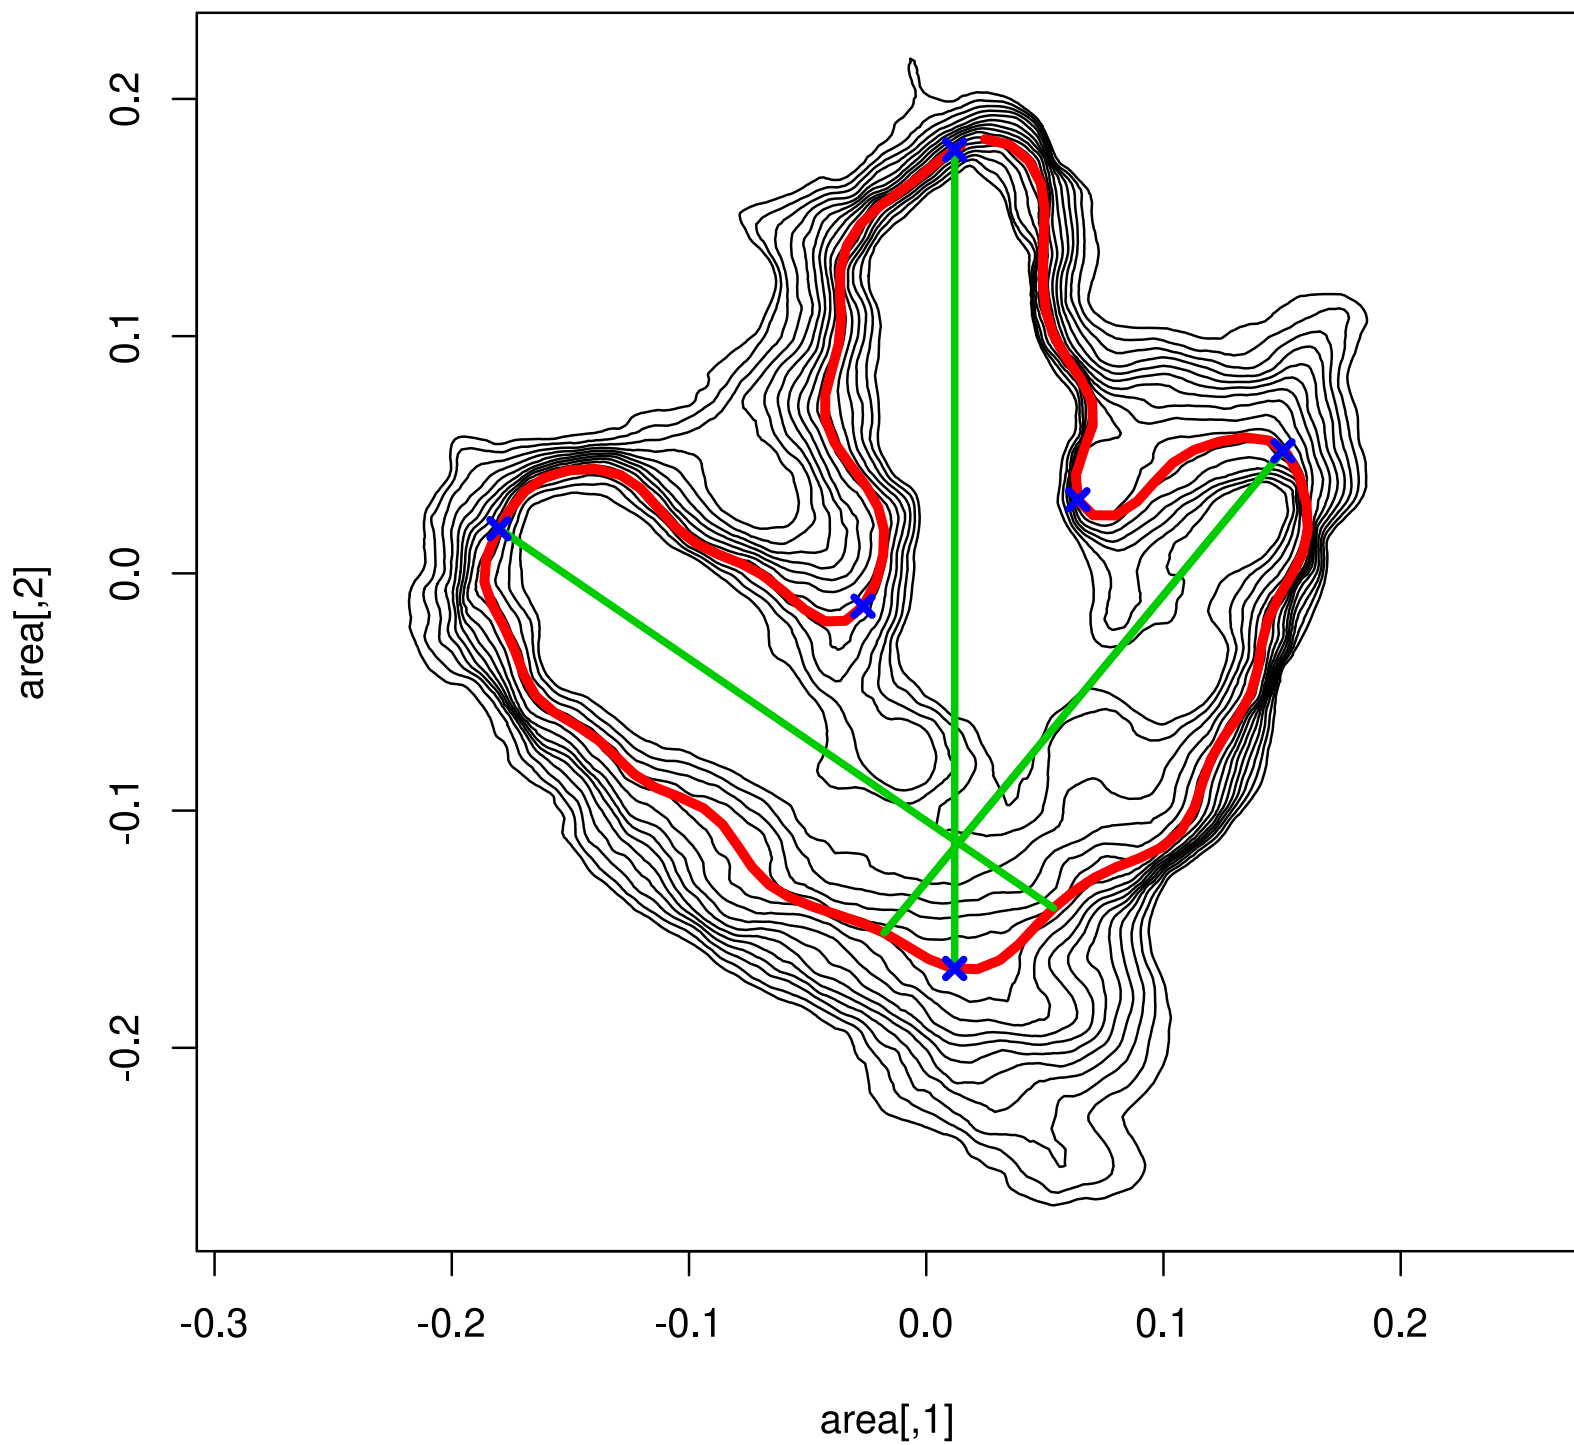

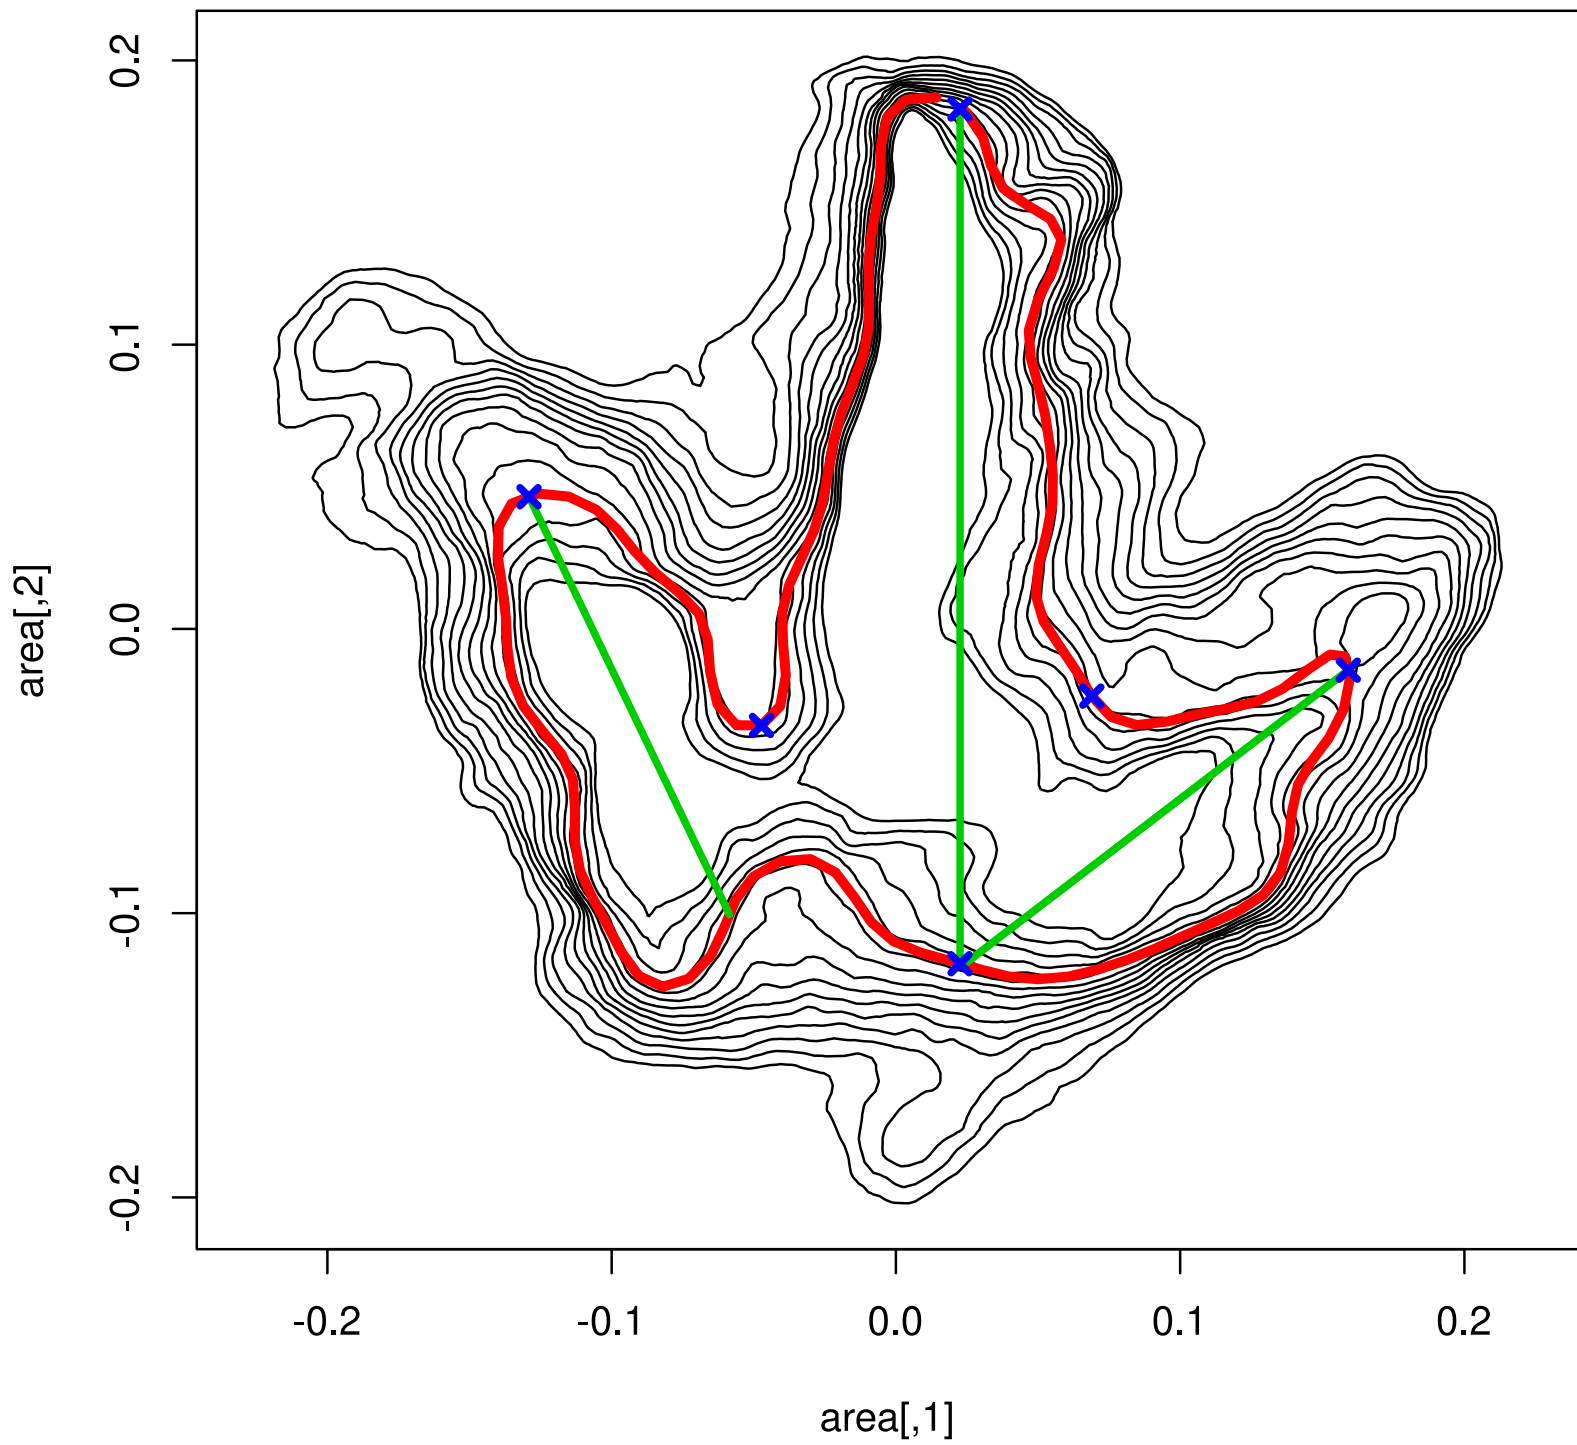

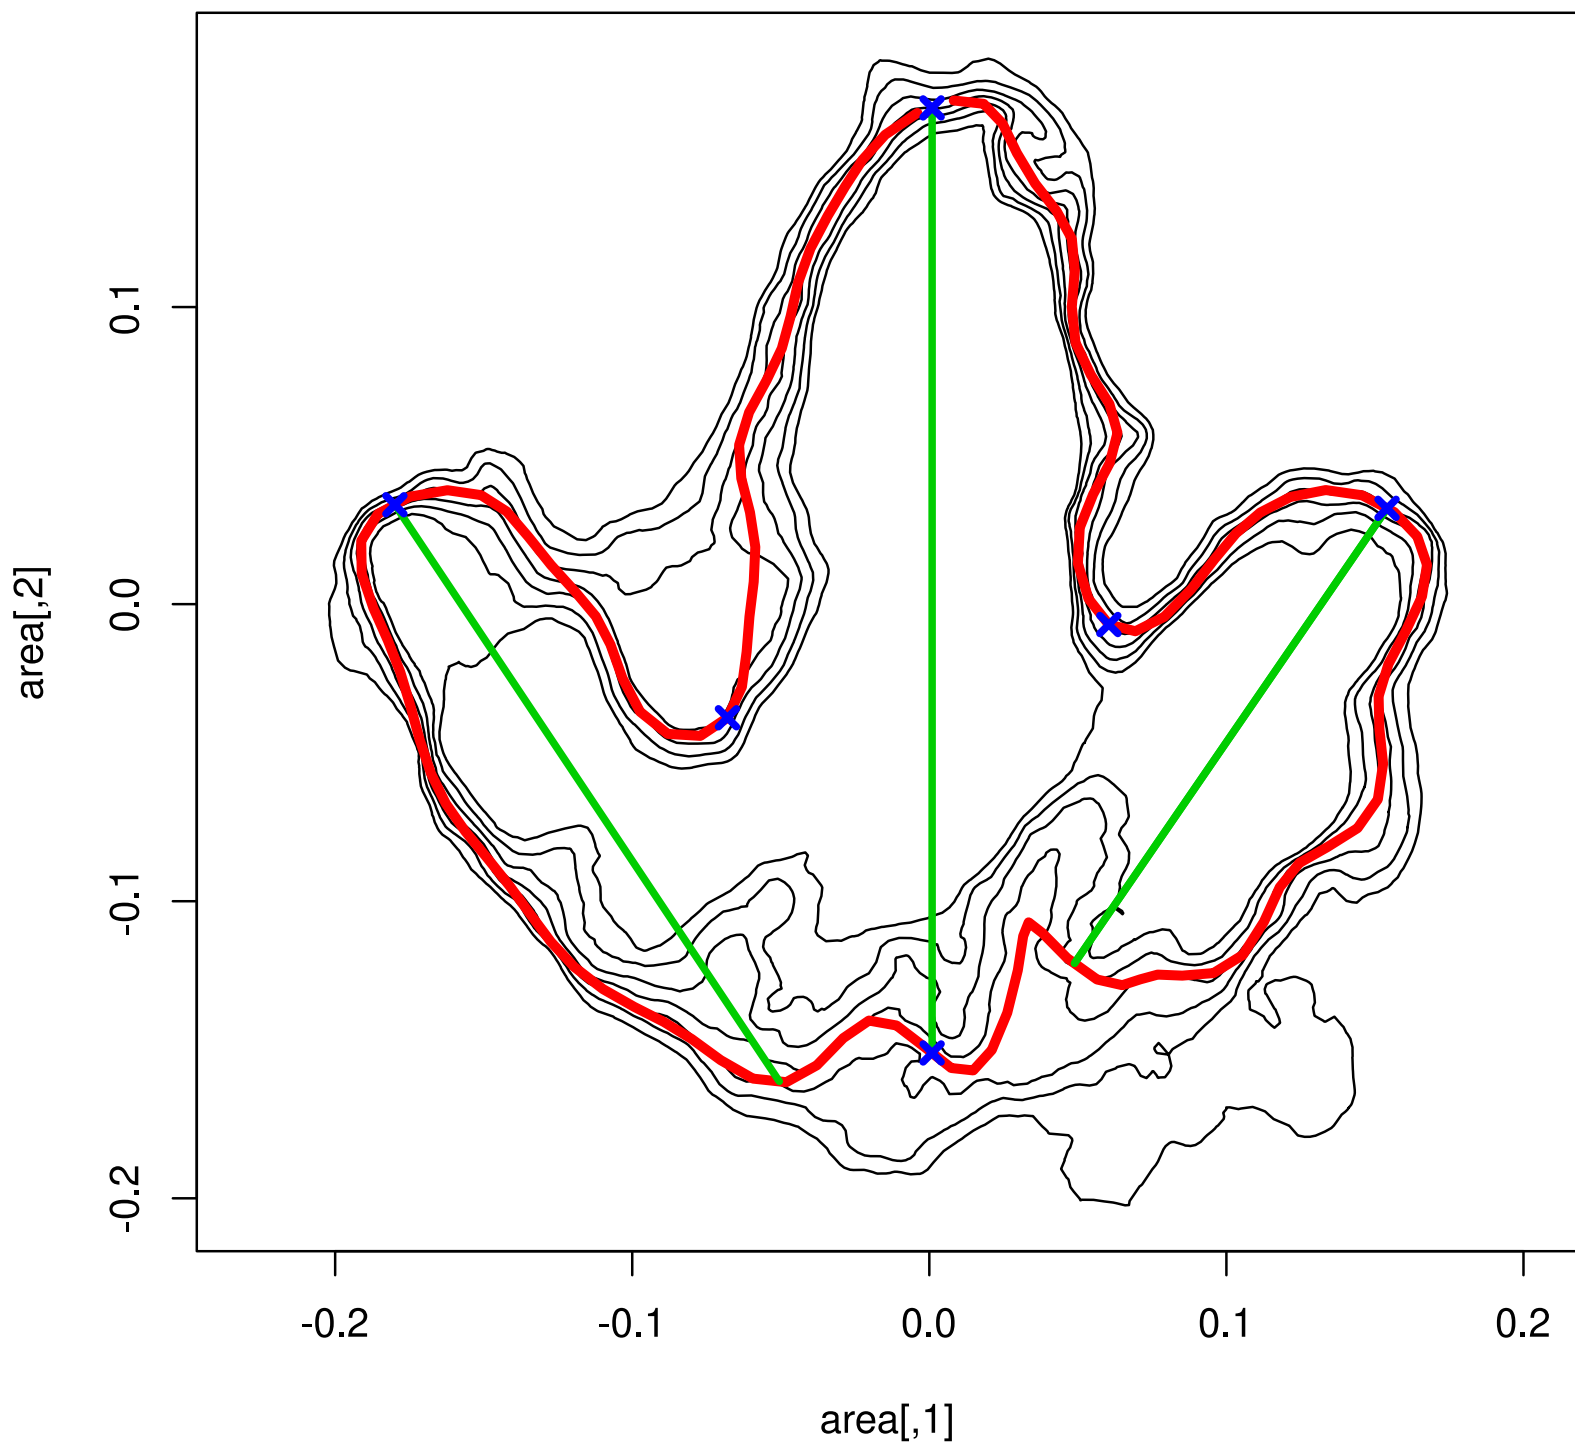

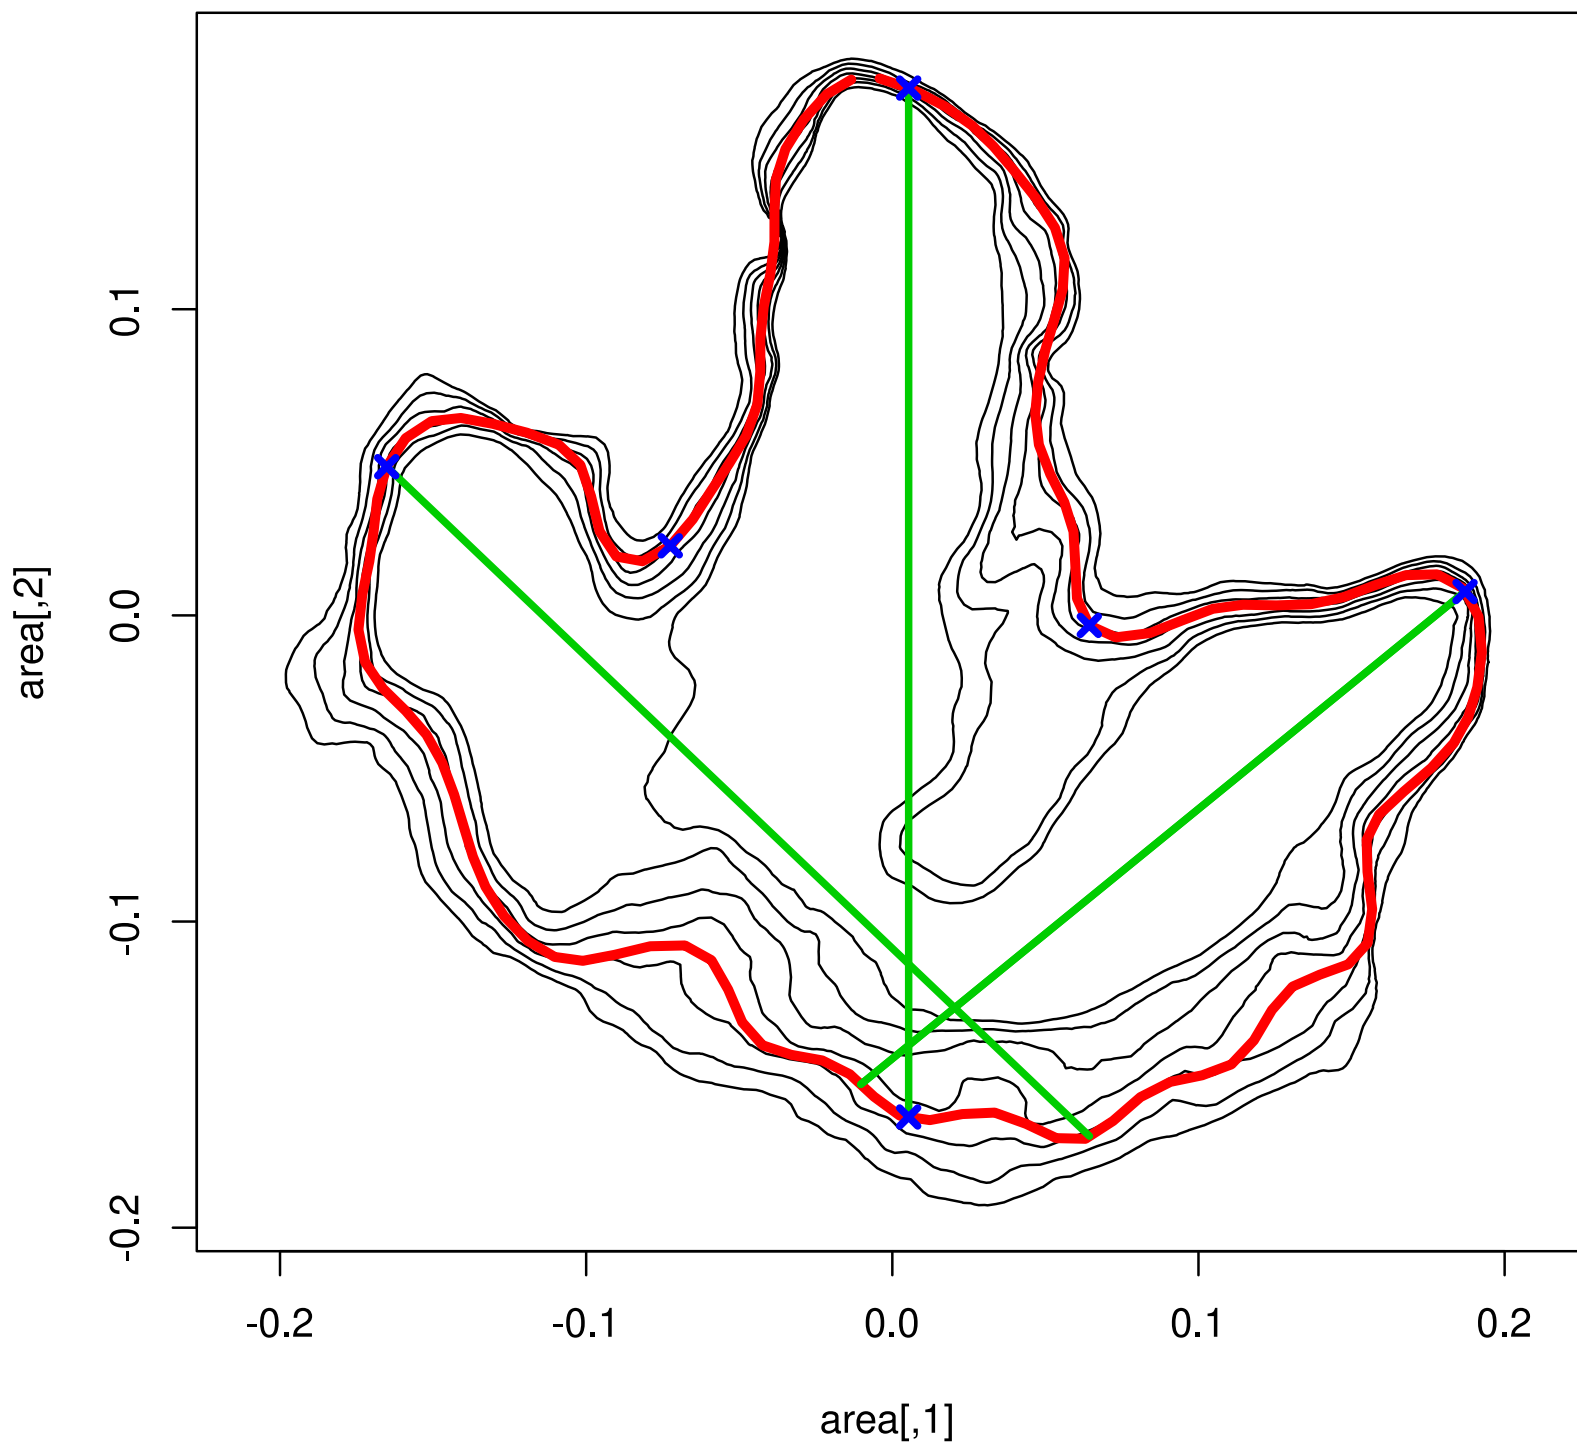

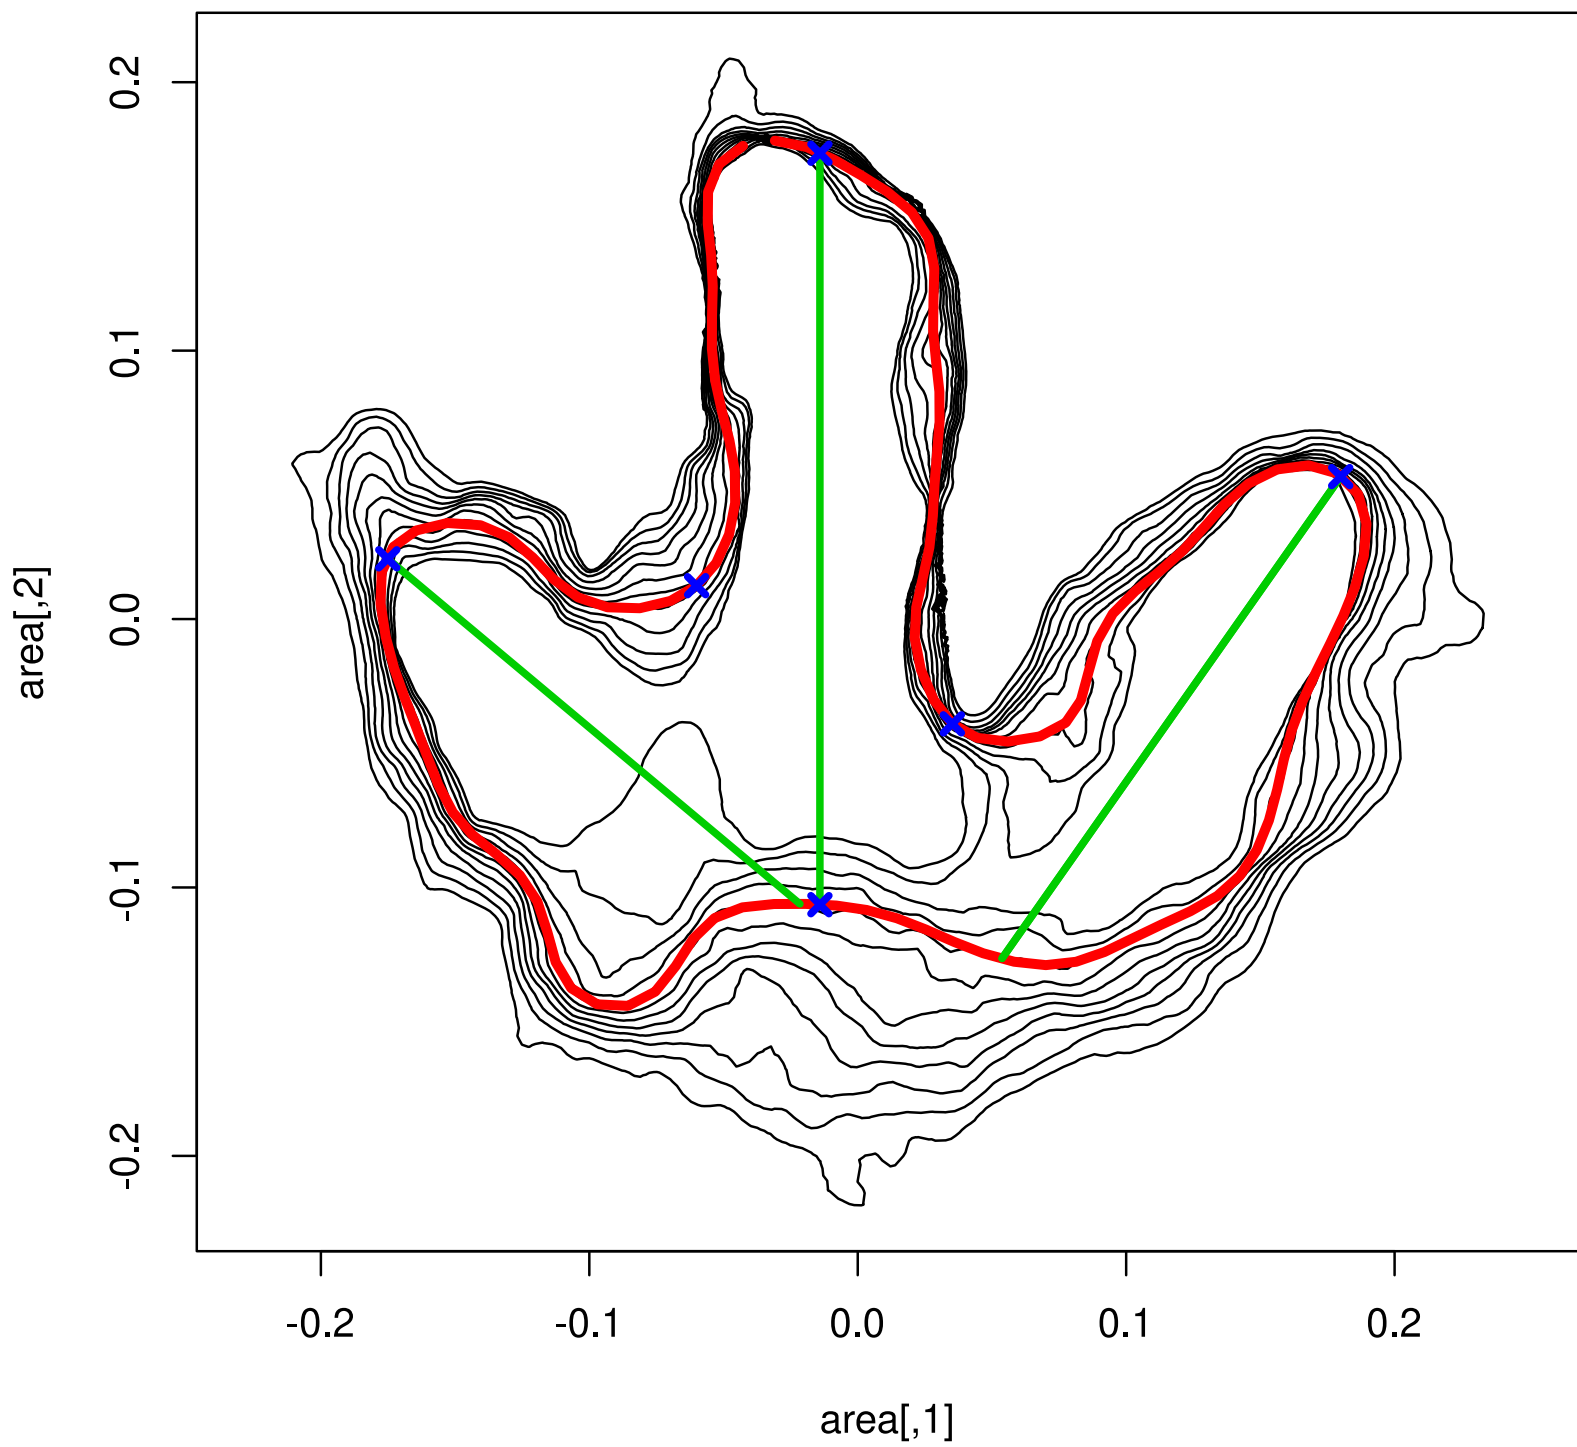



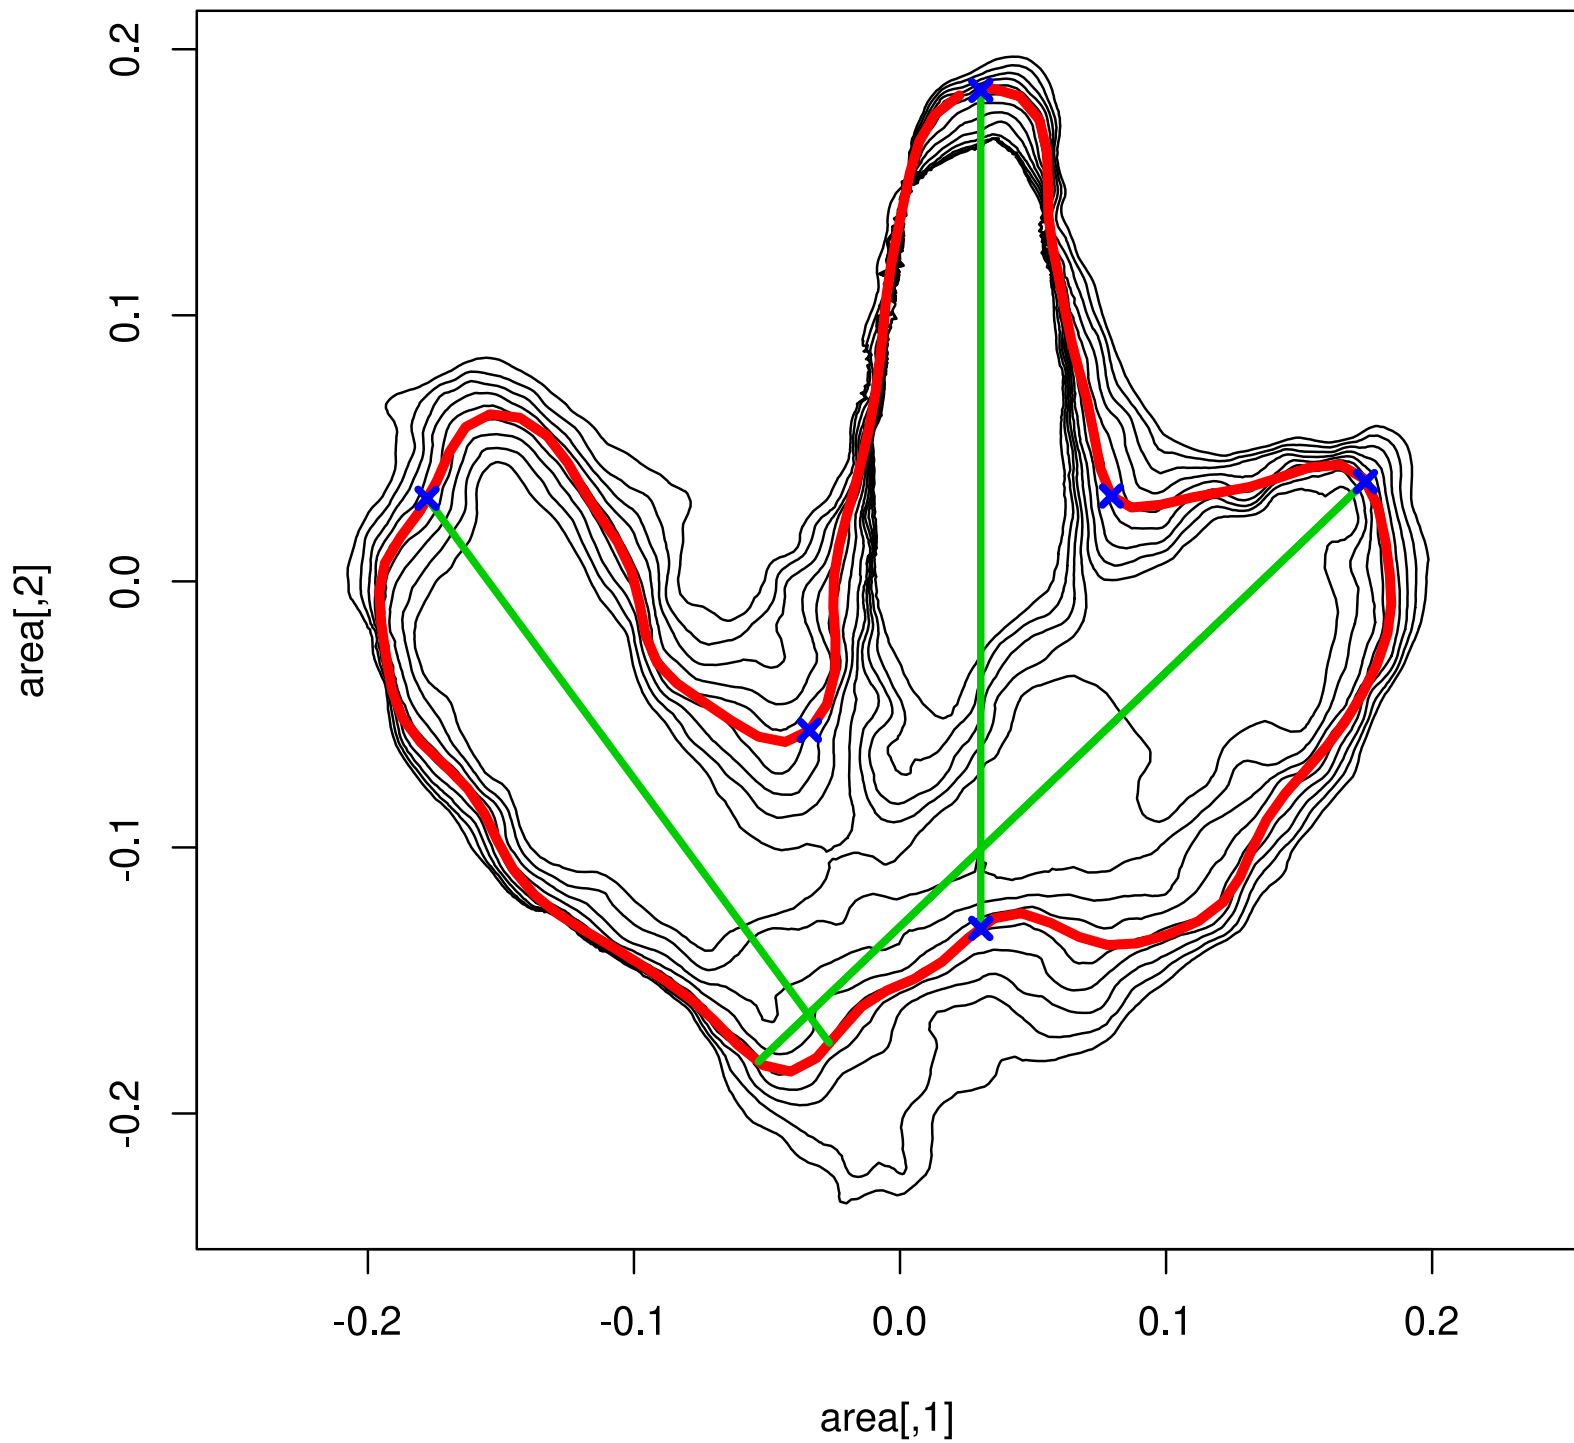

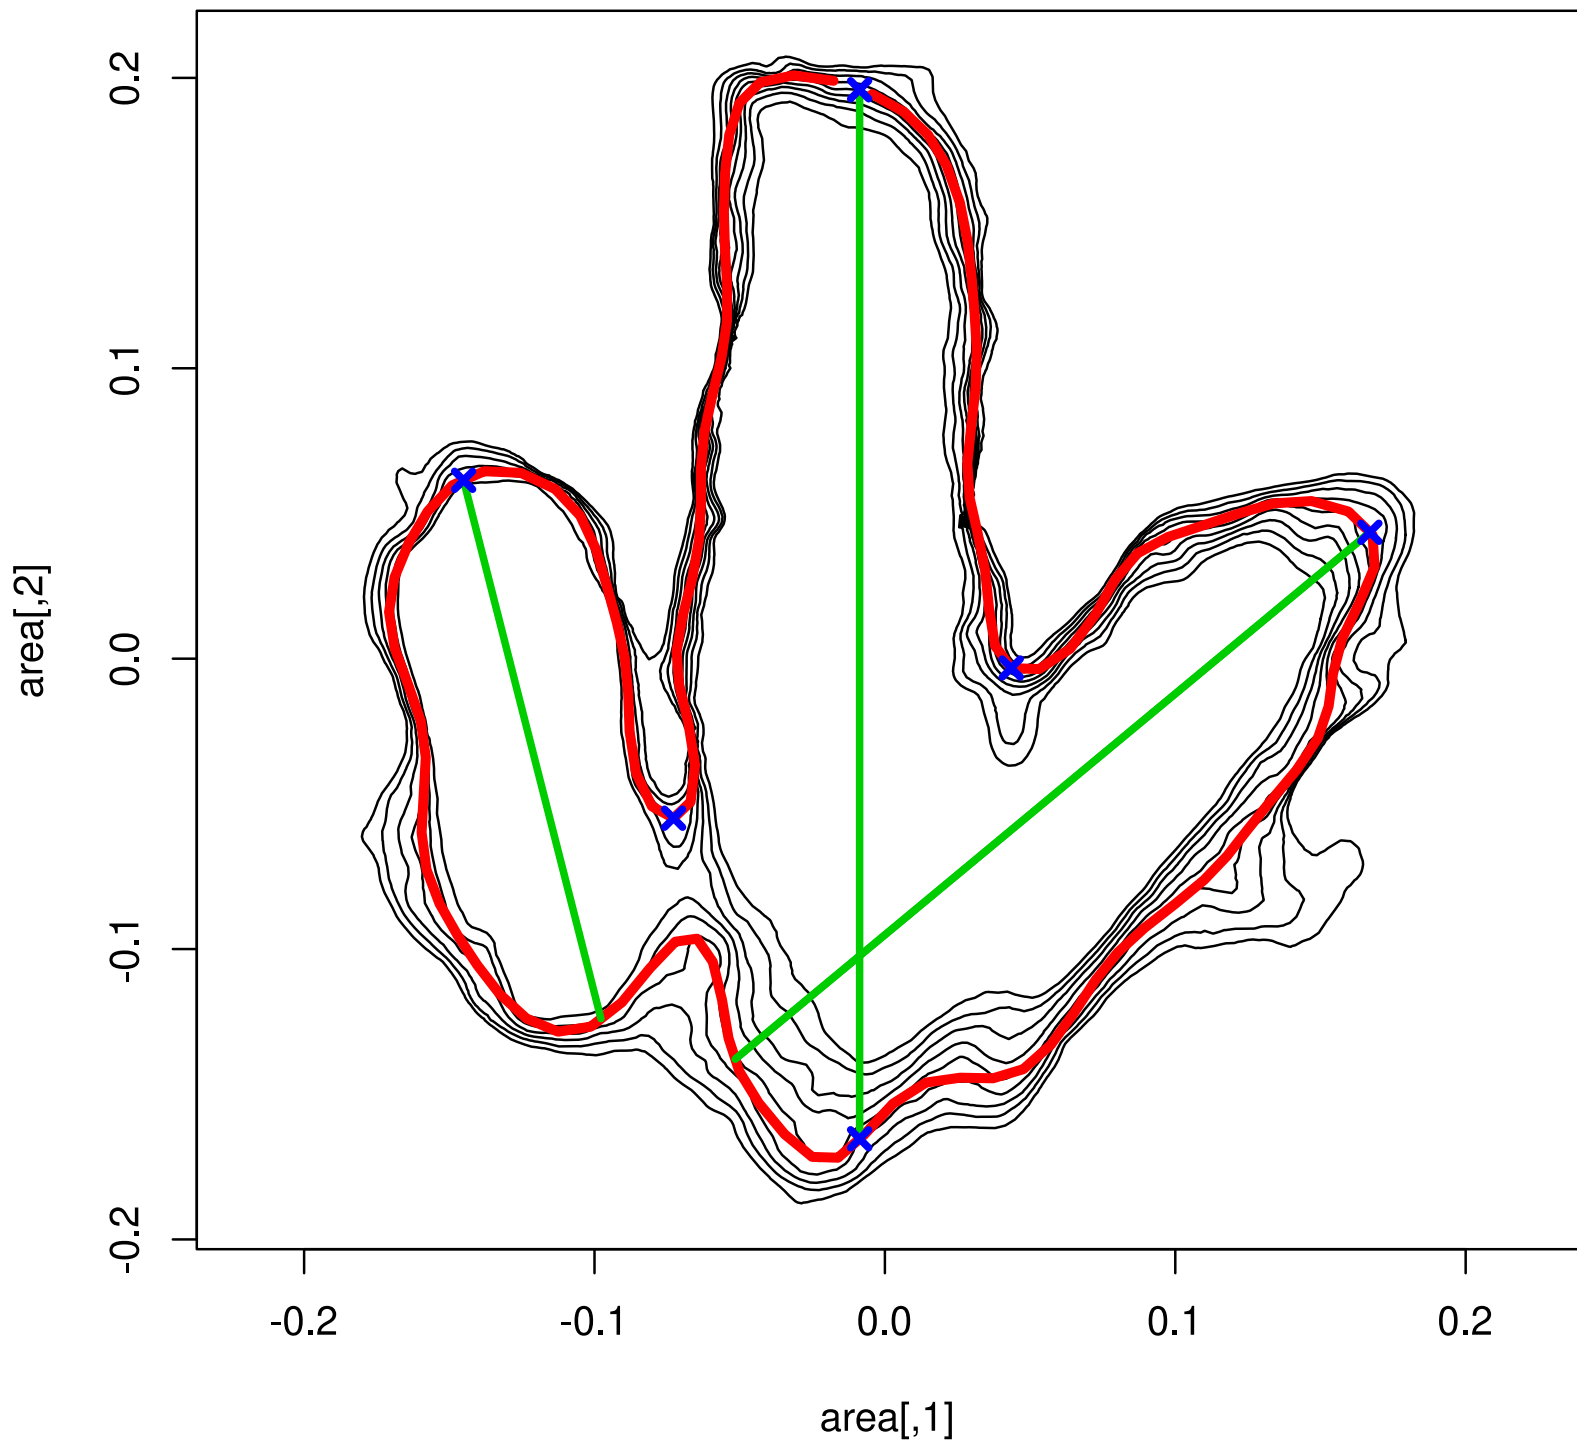

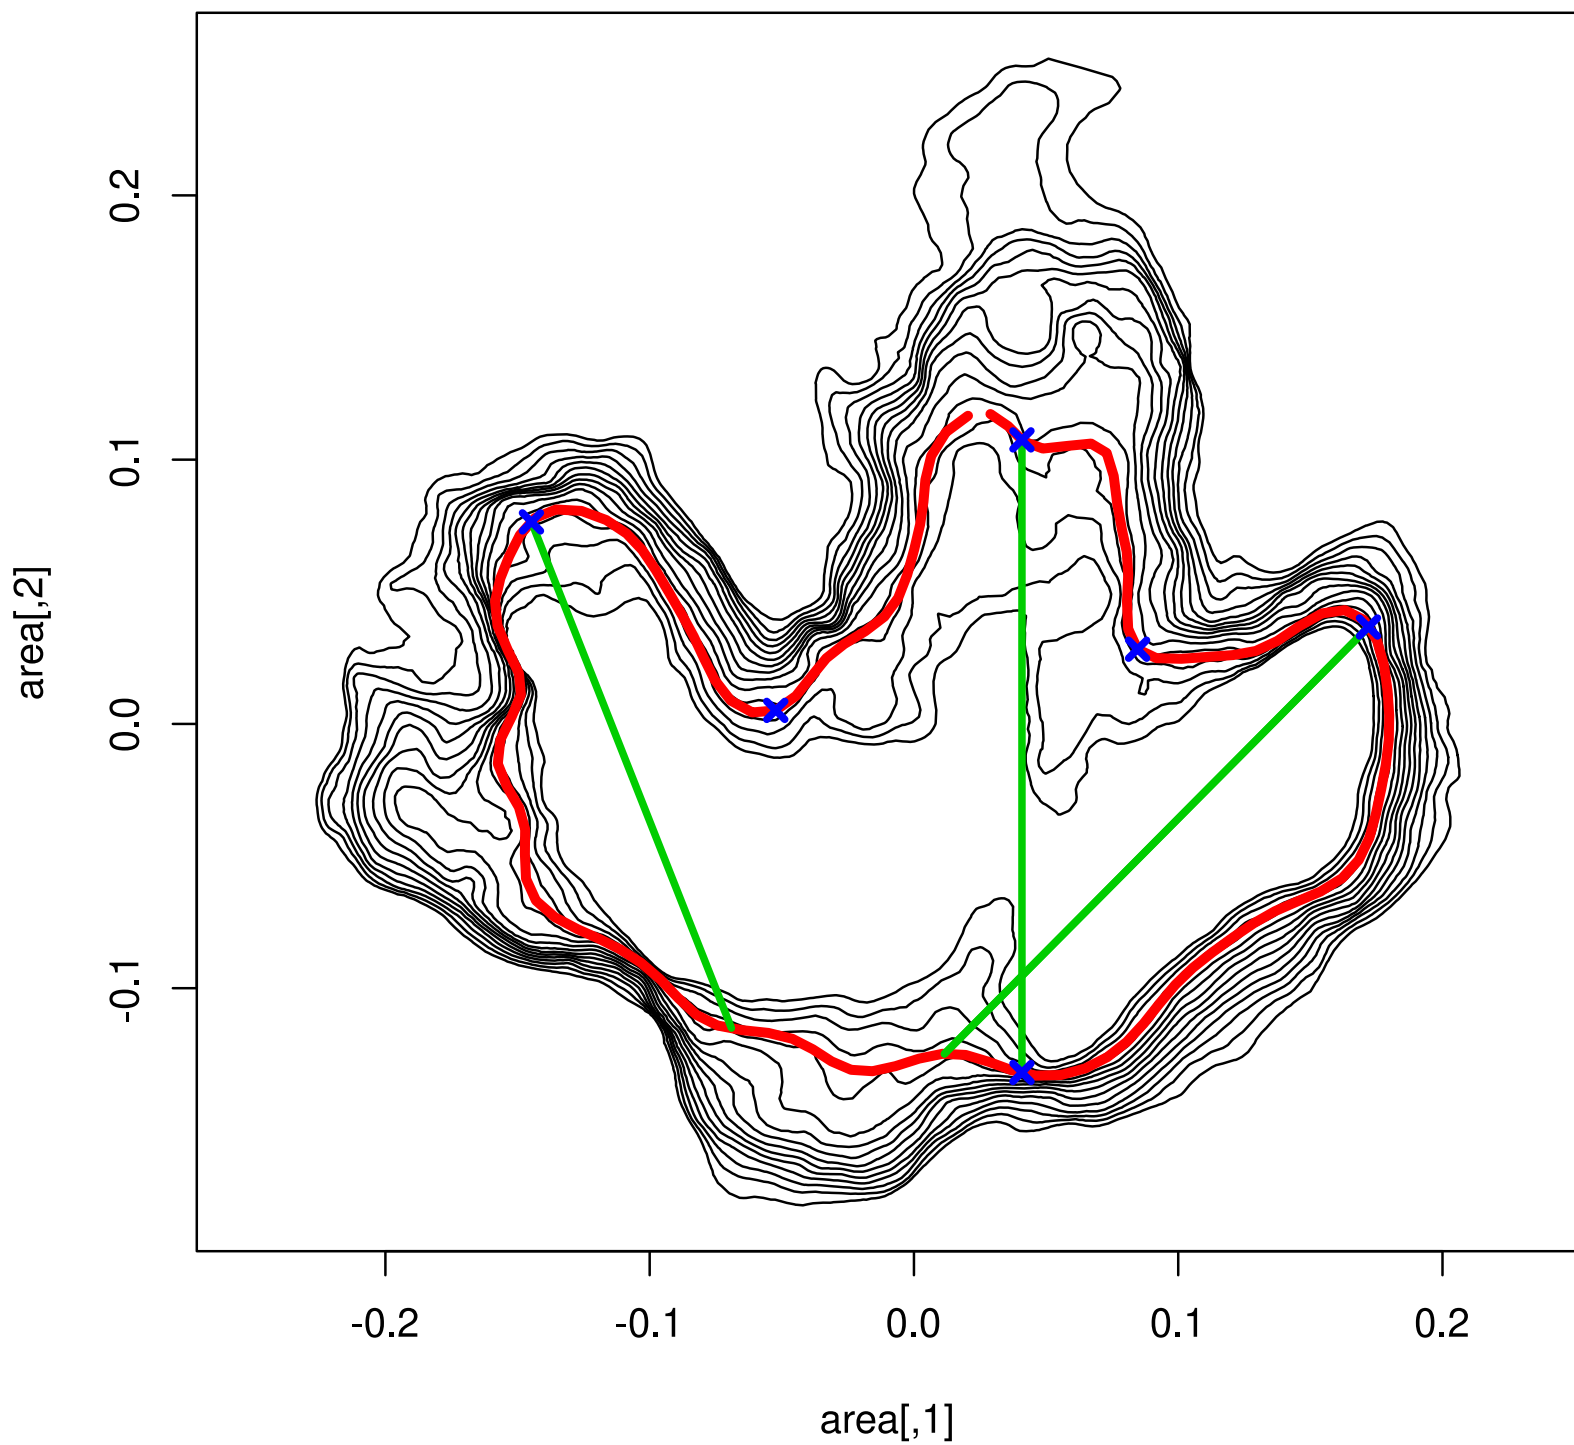

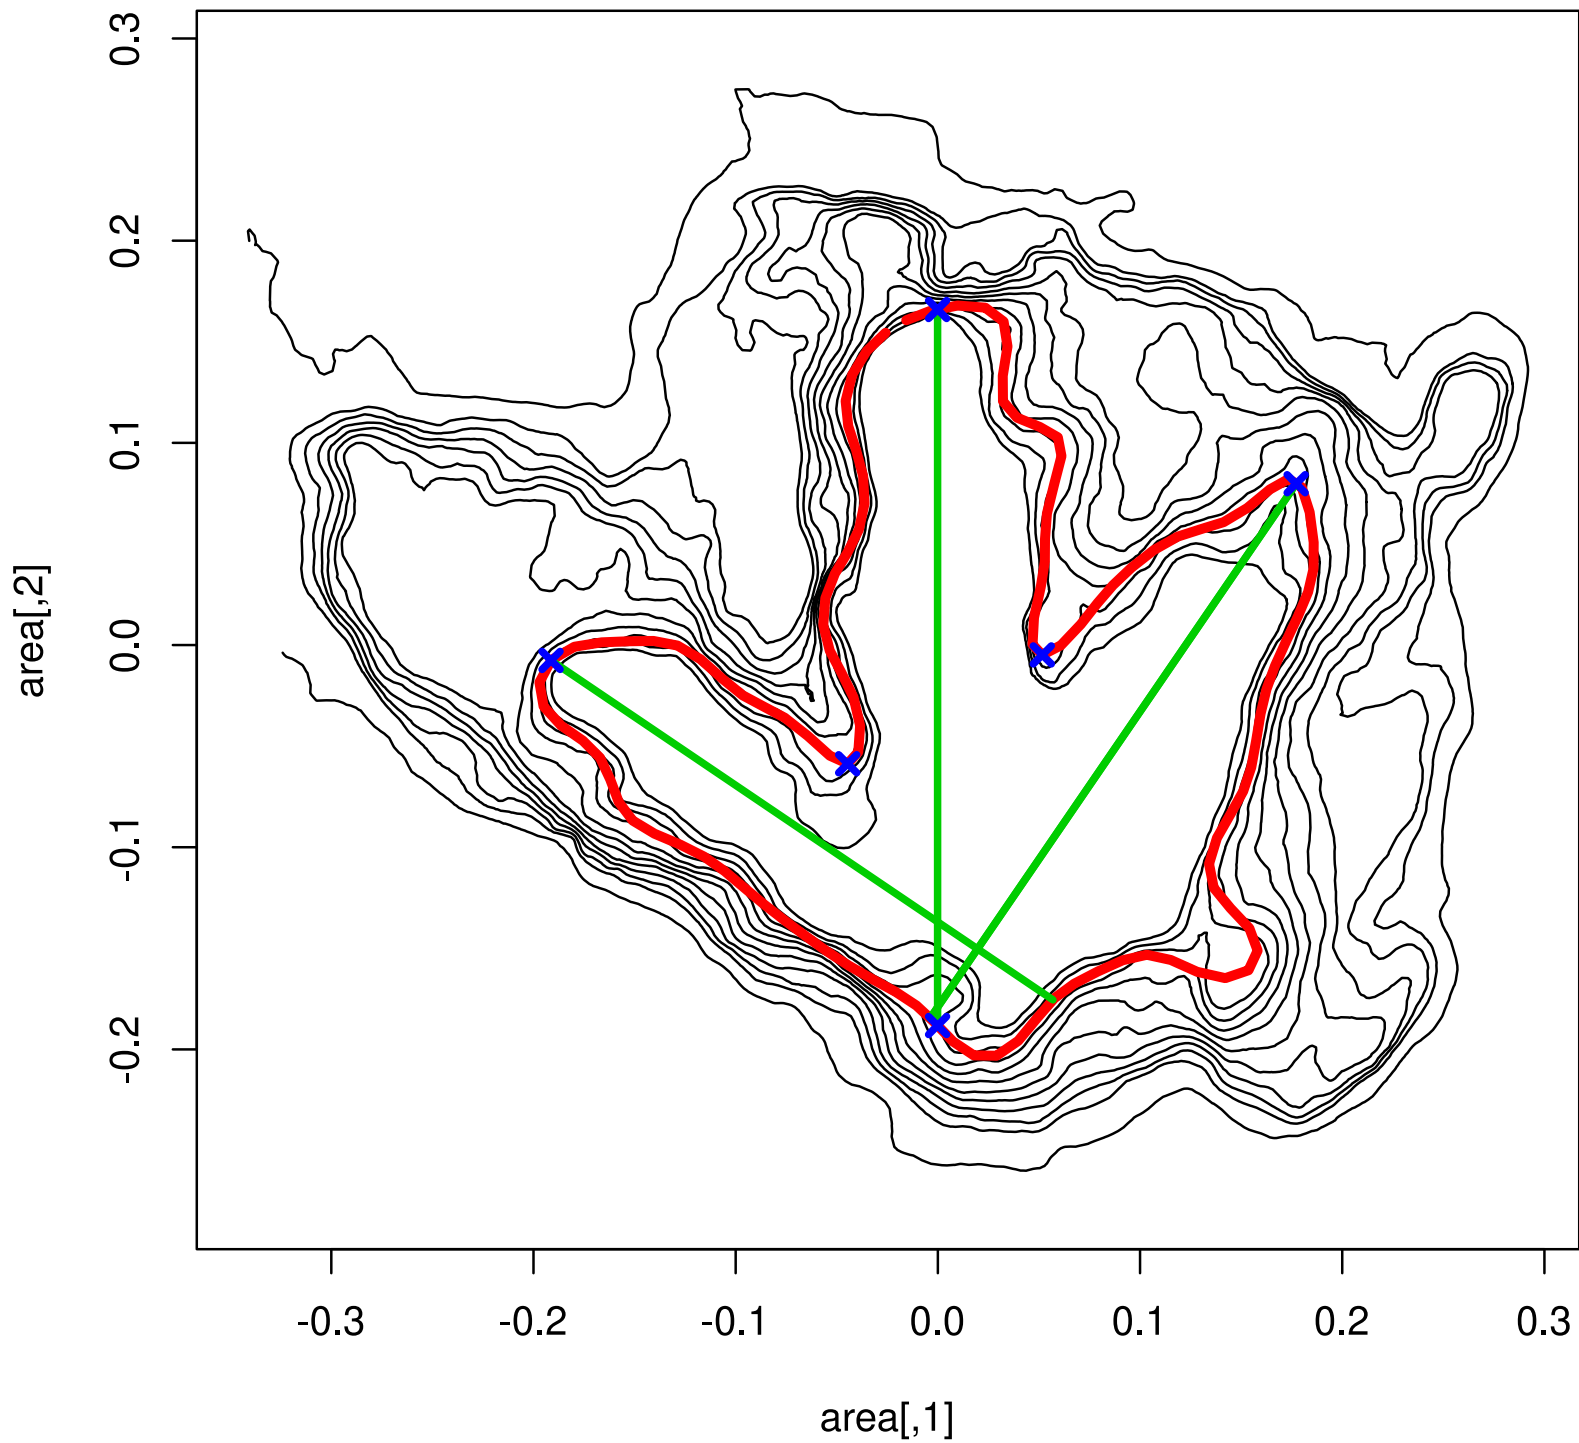

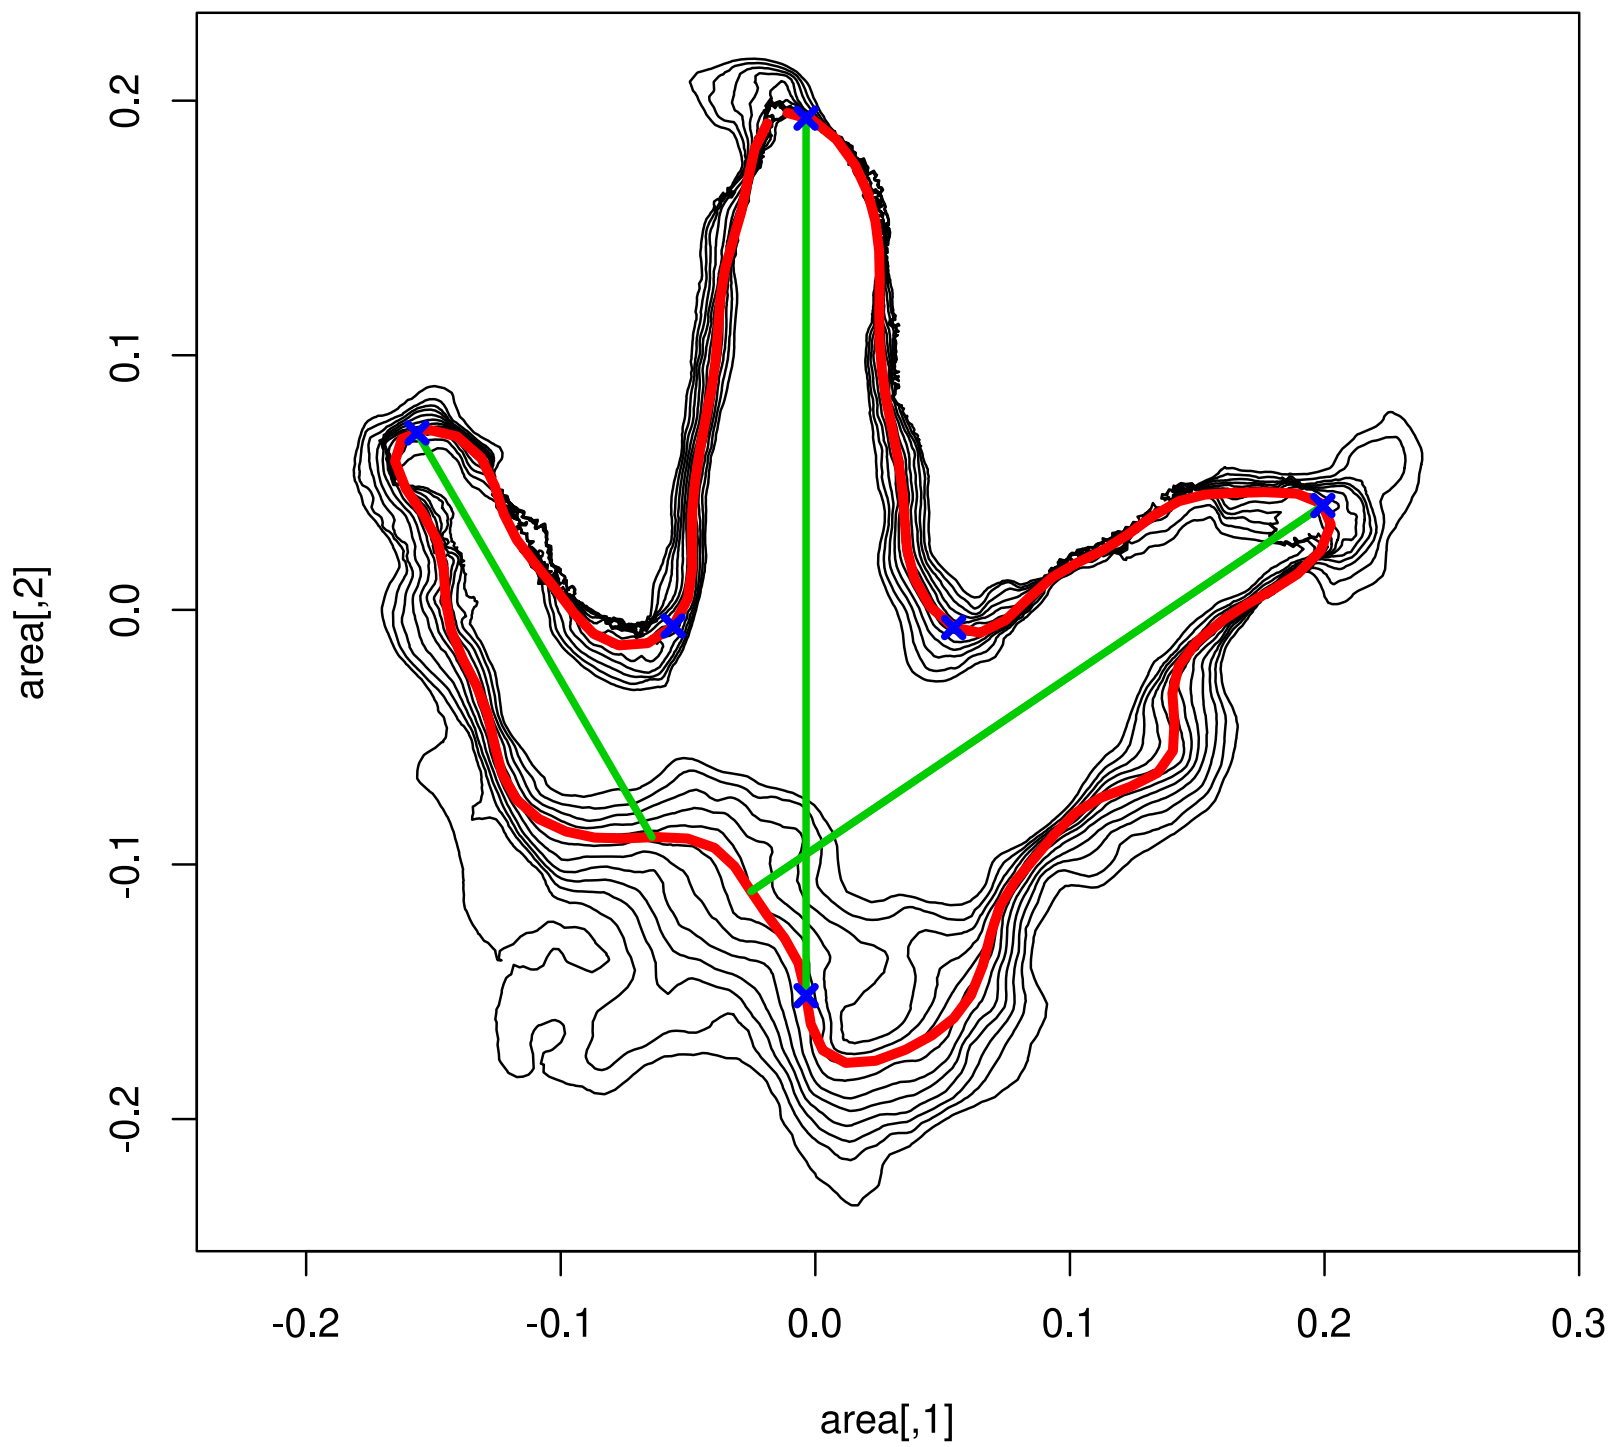

Supplement: Supplementary_File_S3.pdf [file Supplementary_File_S3.pdf]
